# Supplementary material for: CXCL12 drives natural variation in coronary artery anatomy across diverse populations
Source: bioRxiv or medRxiv preprint supplement (doi:10.1101/2023.10.27.23297507), 2024-07-05
Supplement: Supplementary file [file media-1.pdf]

# CXCL12 regulates coronary artery dominance in diverse populations and links development to disease

## SUPPLEMENTARY FIGURES AND TEXT

Pamela E Rios Coronado Ph.D<sup>1</sup>, Daniela Zanetti Ph.D.<sup>2,3,4</sup>, Jiayan Zhou Ph.D.<sup>2,3</sup>, Jeffrey A Naftaly B.A.<sup>1</sup>, Pratima Prabala B.S.<sup>1</sup>, Pik Fang Kho Ph.D.<sup>2,3</sup>, Azalia M Martínez Jaimes B.S. & B.A.<sup>5,1</sup>, Austin T Hilliard Ph.D.<sup>6</sup>, Saiju Pyarajan Ph.D.<sup>7</sup>, Daniel Dochtermann<sup>7</sup>, Million Veteran Program<sup>8</sup>, Kyong-Mi Chang M.D.<sup>9,10</sup>, Virginia D Winn MD, PhD<sup>11</sup>, Anca M Pasca MD<sup>12</sup>, Mary E Plomondon Ph.D.<sup>13,14</sup>, Stephen W Waldo M.D.<sup>13,14,15</sup>, Philip S Tsao Ph.D.<sup>6,16,17</sup>, Shoa L. Clarke MD, PhD<sup>18,3,2</sup>, Kristy Red-Horse Ph.D.<sup>1,19,20</sup>, Themistocles L. Assimes MD, PhD<sup>2,3,21,17</sup>

<sup>1</sup>Department of Biology, Stanford University, Stanford, CA, USA, <sup>2</sup>Department of Medicine, Division of Cardiovascular Medicine, Stanford University School of Medicine, Stanford, CA, USA, <sup>3</sup>VA Palo Alto Healthcare System, Palo Alto, CA, USA, <sup>4</sup>Institute of Genetic and Biomedical Research, National Research Council, Cagliari, Sardinia, Italy, <sup>5</sup>Department of Developmental Biology, Stanford University School of Medicine, Stanford, CA, USA, <sup>6</sup>VA Palo Alto Health Care System, Palo Alto, CA, USA, <sup>7</sup>Center for Data and Computational Sciences, VA Boston Healthcare System, Boston, MA, USA, <sup>8</sup>A list of consortium members can be found in the Supplementary File, <sup>9</sup>Corporal Michael J. Crescenz VA Medical Center, Philadelphia, PA, USA, <sup>10</sup>Department of Medicine, Division of Gastroenterology and Hepatology, University of Pennsylvania Perelman School of Medicine, Philadelphia, PA, USA, <sup>11</sup>Department of Obstetrics and Gynecology, Stanford University School of Medicine, Stanford, CA, USA, <sup>12</sup>Department of Pediatrics, Neonatology, Stanford University School of Medicine, Stanford, CA, USA, <sup>13</sup>Department of Medicine, Rocky Mountain Regional VA Medical Center, Aurora, CO, USA, <sup>14</sup>CART Program, VHA Office of Quality and Patient Safety, Washington, DC, USA, <sup>15</sup>Division of Cardiology, University of Colorado School of Medicine, Aurora, CO, USA, <sup>16</sup>Department of Medicine, Stanford University School of Medicine, Stanford, CA, USA, <sup>17</sup>Cardiovascular Institute, Stanford University School of Medicine, Stanford, CA, USA, <sup>18</sup>Department of Medicine, Stanford Prevention Research Center, Stanford University School of Medicine, Stanford, CA, USA, <sup>19</sup>Institute for Stem Cell Biology and Regenerative Medicine, Stanford University School of Medicine, Stanford, CA, USA, <sup>20</sup>Howard Hughes Medical Institute, Chevy Chase, MD, USA, <sup>21</sup>Department of Epidemiology and Population Health, Stanford University School of Medicine, Stanford, CA, USA

Pamela E Rios Coronado, Daniela Zanetti, and Jiayan Zhou contributed as co-lead junior authors. Shoa L. Clarke, Kristy Red-Horse Ph.D, and Themistocles L. Assimes contributed as co-supervising senior authors.

SUPPLEMENTARY FIGURES

(A)

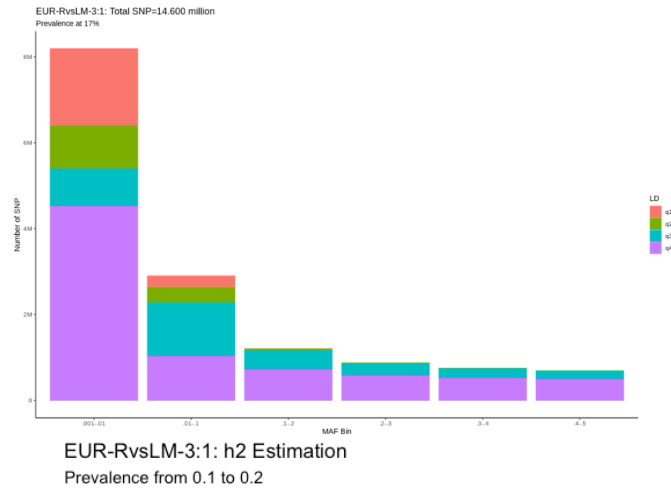

(B)

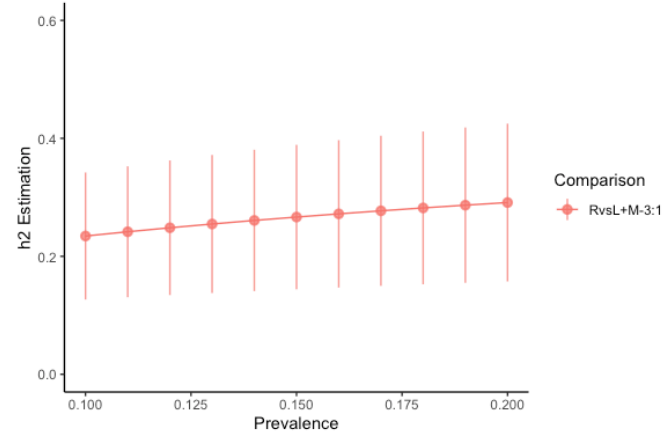

(C)

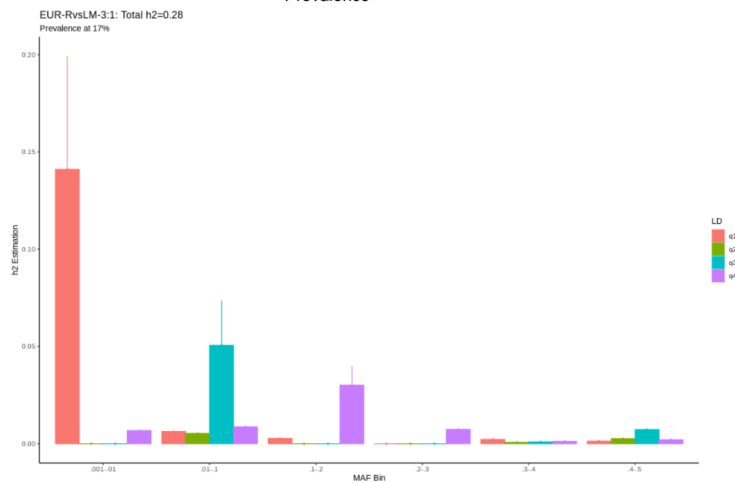

**Supplementary Figure 1.** Heritability analyses using GREML-LDMS-I as implemented in GCTA for Right vs. Left and mixed dominance combined in Europeans (A) Number of genetic variants by minor allele frequency (MAF) and linkage disequilibrium (LD score bins (B) h2 estimation on a liability scale assuming prevalence of left and mixed dominance from 10% to 20% (C) Stratified h2 contribution to total h2 by MAD and LD score bins

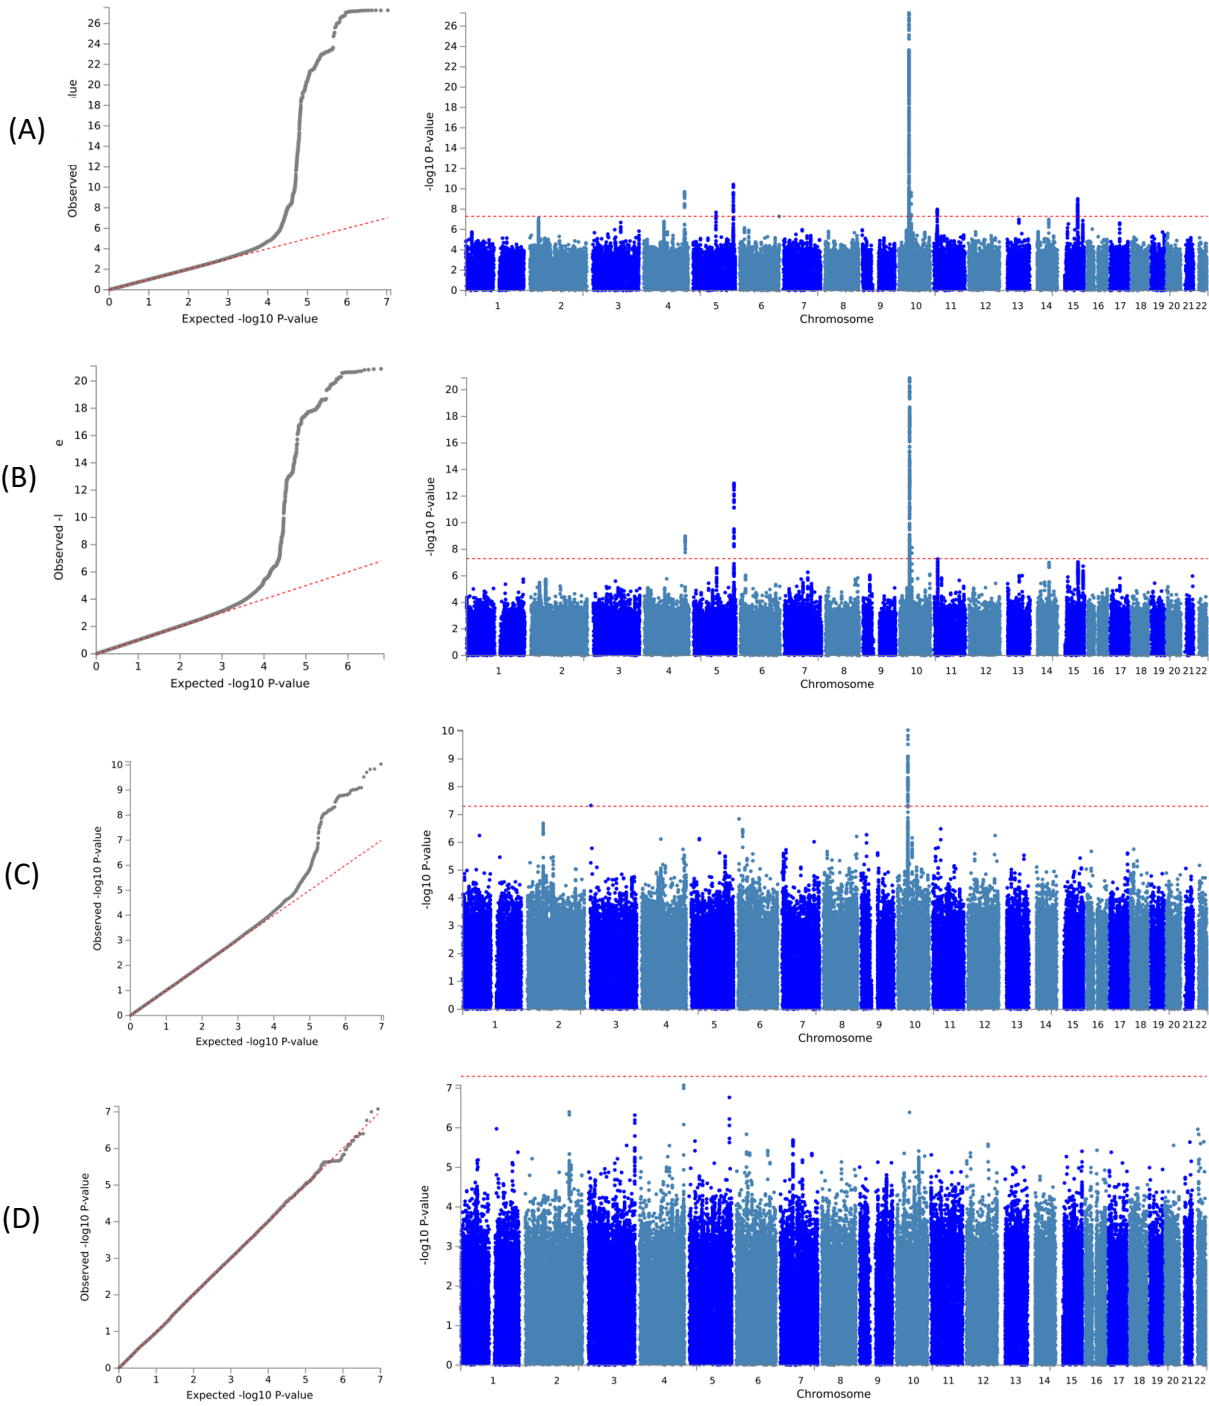

**Supplementary Figure 2.** Q-Q and Manhattan plots for Right vs Left for ALL (A), EUROPEAN (B), AFRICAN (C) and ADMIXED AMERICAN (D).

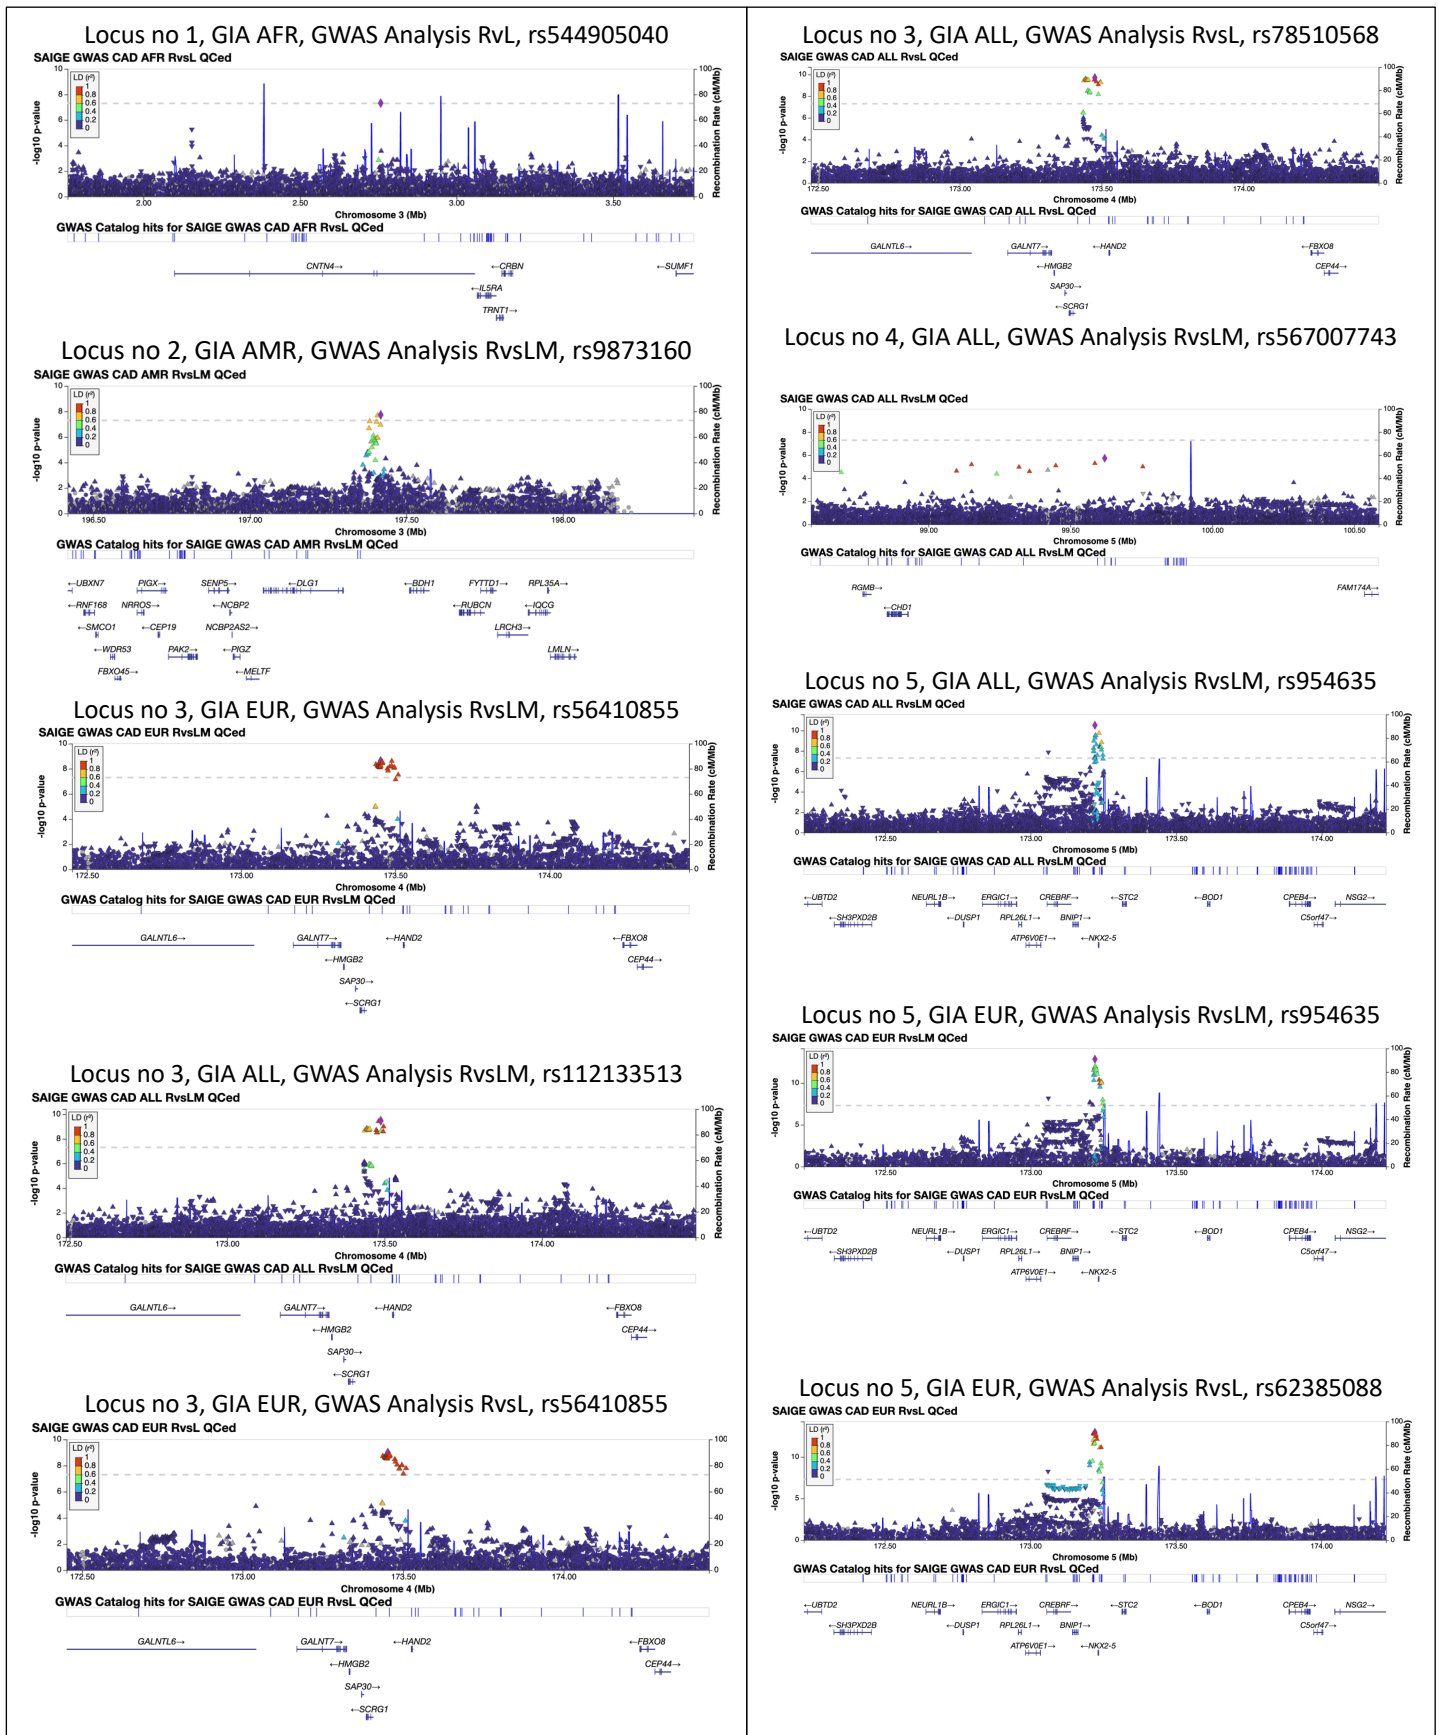

**Supplementary Figure 3.** LocusZoom plots around lead genetic variant for analyses listed in Table 1.

Locus no 5, GIA ALL, GWAS Analysis RvsL, rs5589355

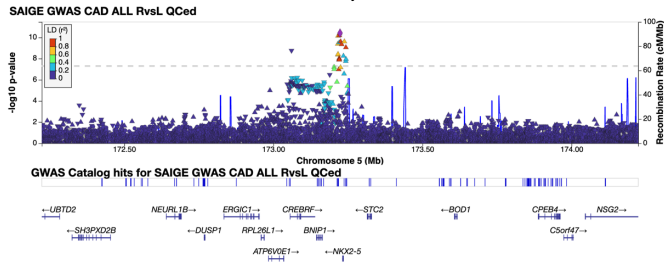

Locus no 5, GIA ALL, GWAS Analysis RvsL, rs5589355

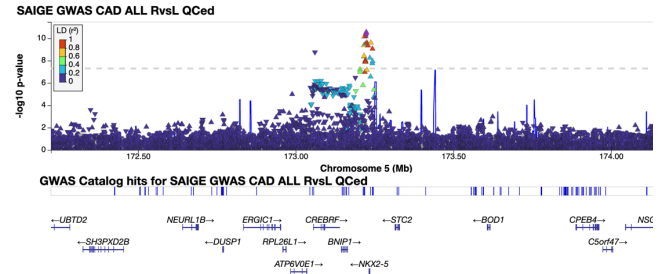

Locus no 6, GIA ALL, GWAS Analysis RvsL, rs2902339

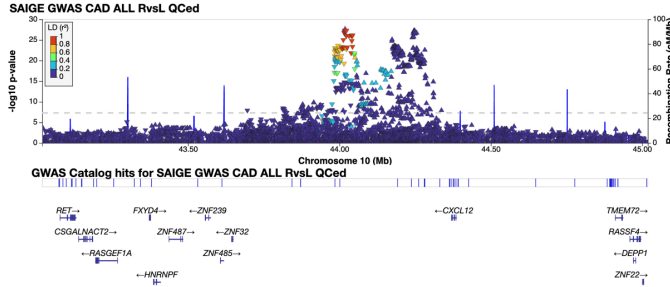

Locus no 6, GIA ALL, GWAS Analysis RvsL, rs2902339

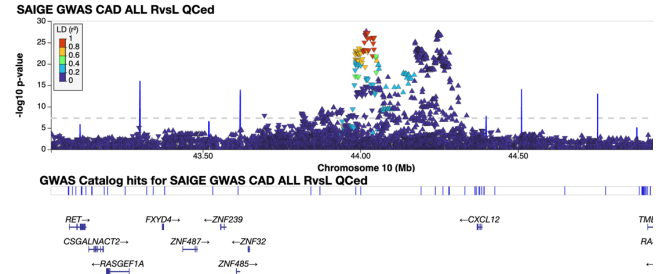

Locus no 6, GIA EUR, GWAS Analysis RvsL, rs7917534

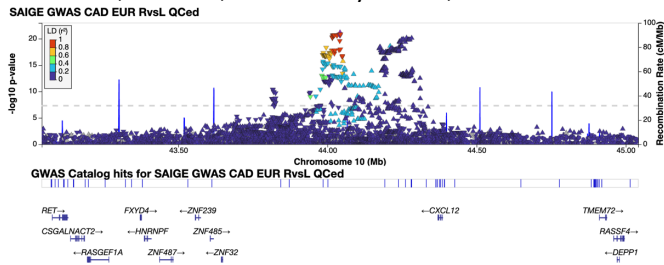

Locus no 6, GIA EUR, GWAS Analysis RvsL, rs7917534

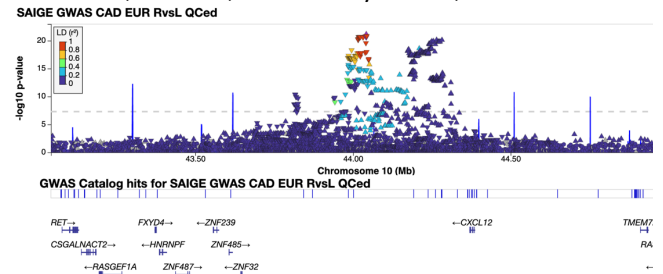

Locus no 6, GIA EUR, GWAS Analysis RvsLM, rs589655

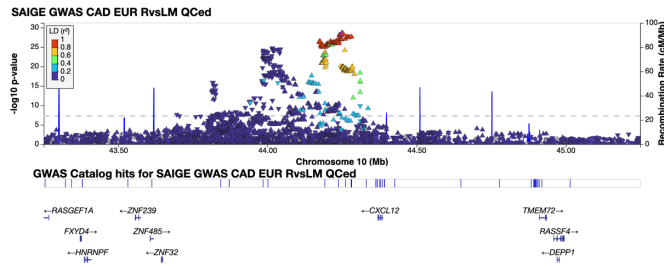

Locus no 6, GIA EUR, GWAS Analysis RvsLM, rs589655

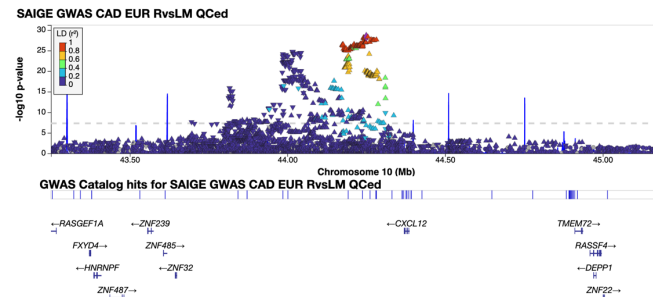

Locus no 6, GIA AFR, GWAS Analysis RvsL, rs2576354

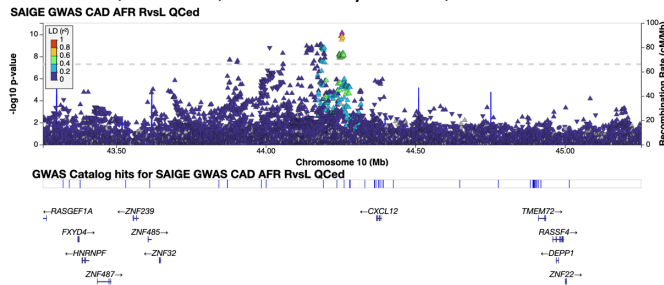

Locus no 6, GIA AFR, GWAS Analysis RvsL, rs2576354

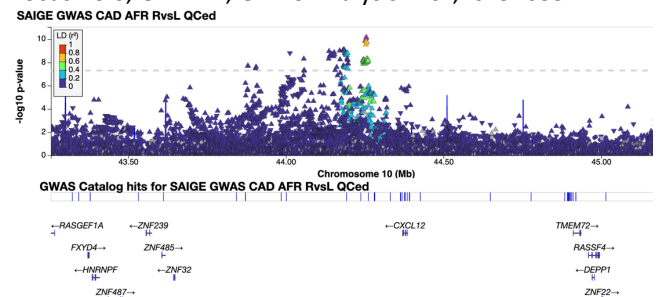

Supplementary Figure 3 (con't). LocusZoom plots around lead genetic variant for analyses listed in Table 1.

### Locus no 6, GIA AFR, GWAS Analysis RvsLM, rs2576354

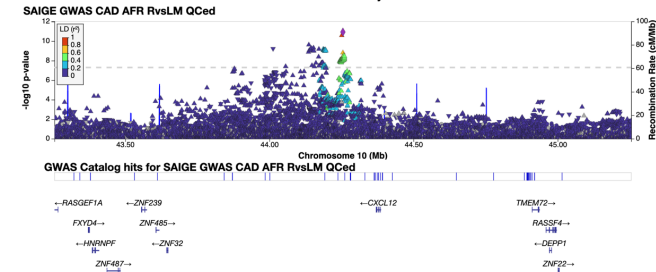

### Locus no 6, GIA ALL, GWAS Analysis RvsLM, rs606314

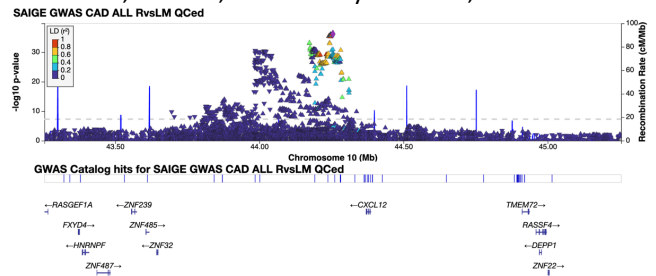

### Locus no 7, GIA ALL, GWAS Analysis RvsL, rs1194743

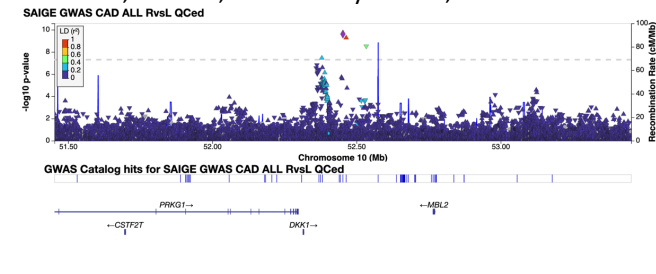

### Locus no 7, GIA EUR, GWAS Analysis RvsL, rs1194743

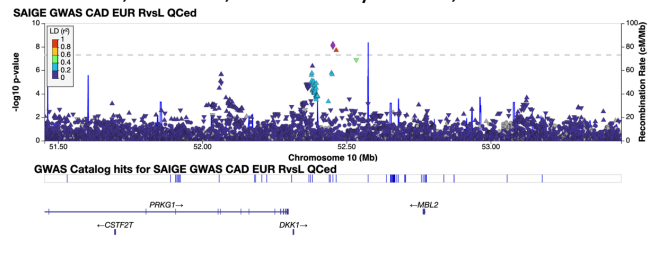

### Locus no 8, GIA ALL, GWAS Analysis RvsL, rs35342212

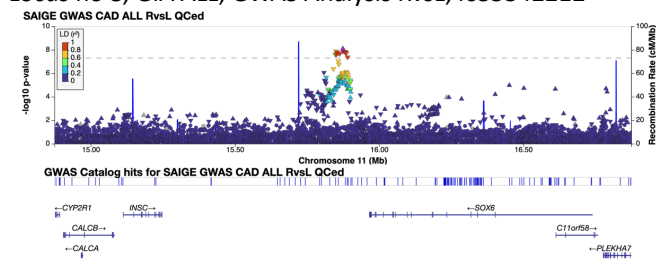

### Locus no 8, GIA ALL, GWAS Analysis RvsLM, rs35342212

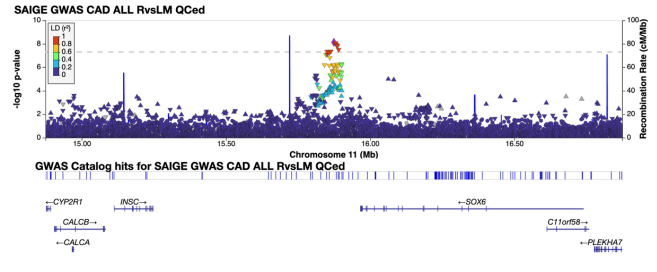

### Locus no 9, GIA ALL, GWAS Analysis RvsL, rs58473469

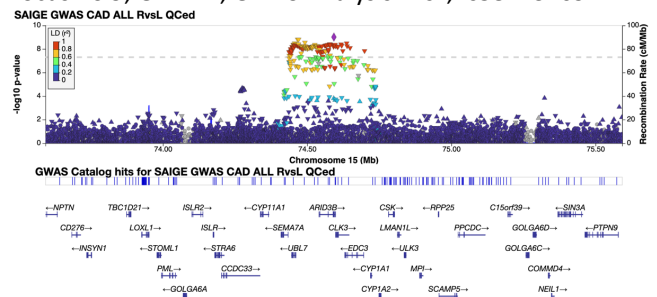

### Locus no 10, GIA ALL, GWAS Analysis RvsLM, rs851058

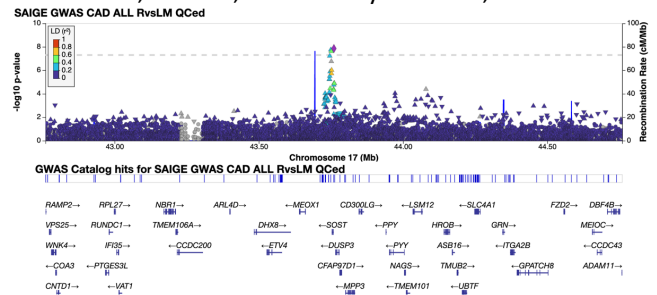

### Locus no 10, GIA EUR, GWAS Analysis RvsLM, rs851058

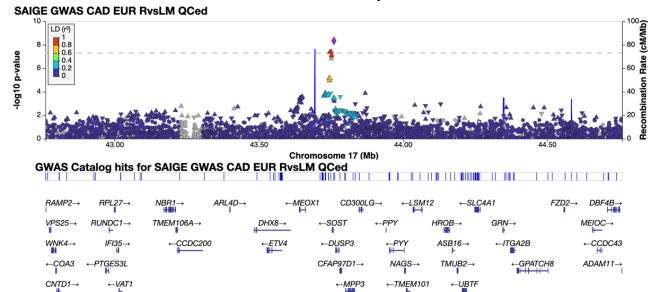

Supplementary Figure 3 (con't). LocusZoom plots around lead genetic variant for analyses listed in Table 1.

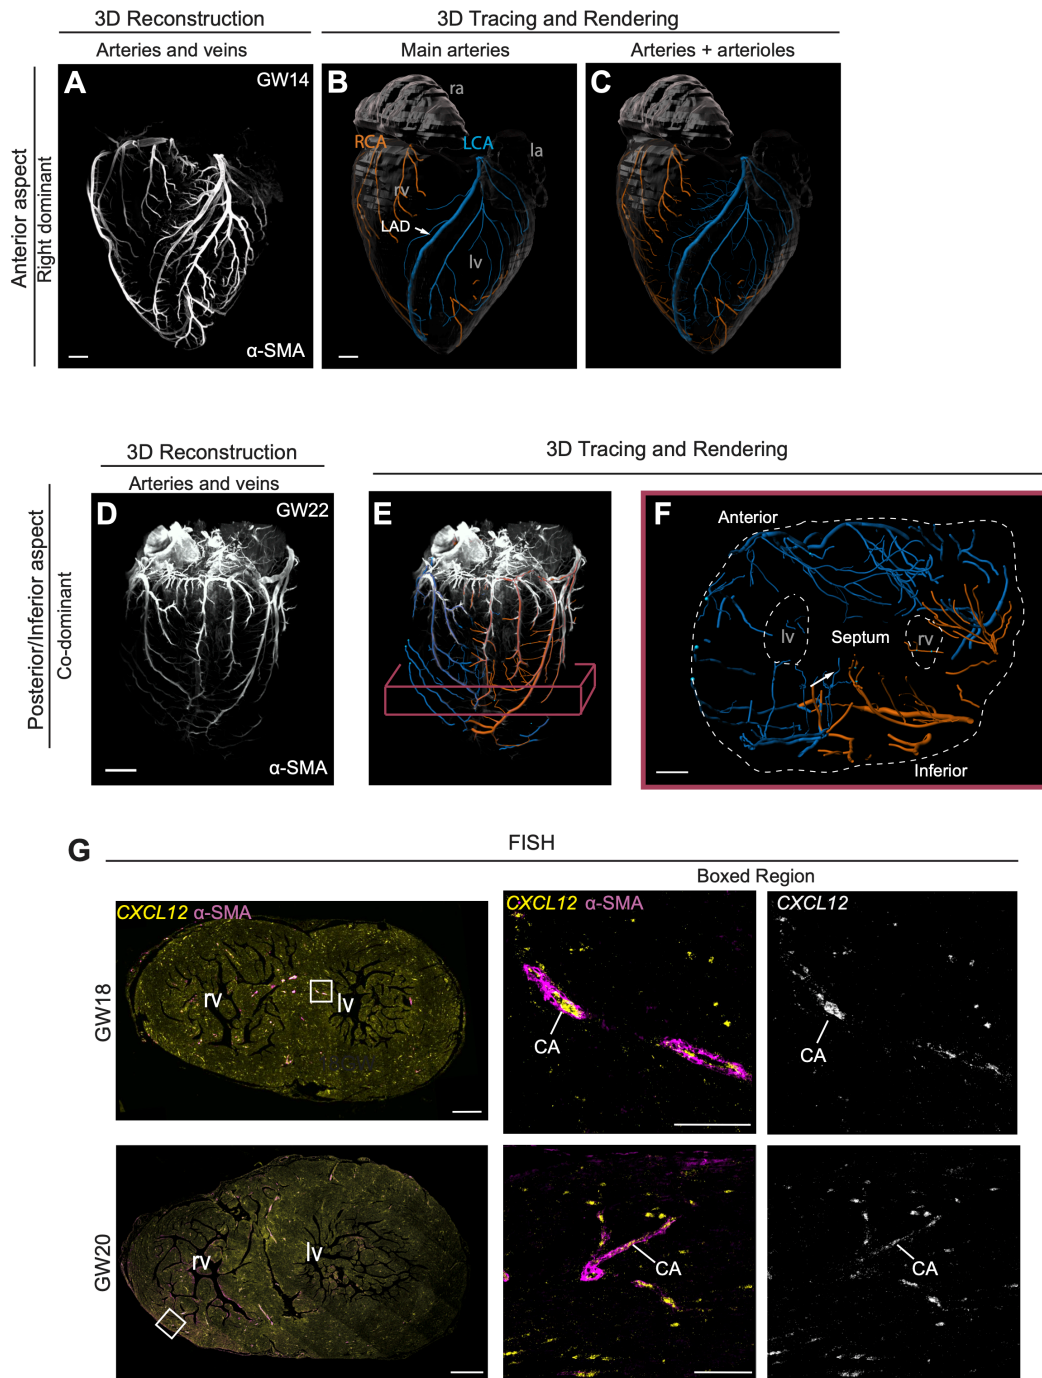

**Supplemental Figure 4. Artery imaging and *CXCL12* expression in fetal hearts.** (A) Anterior view of a three dimensional (3D) reconstruction of a gestational week (GW) 14 heart subjected to whole-organ immunolabeling for alpha-smooth muscle actin ( $\alpha$ -SMA). (B and C) 3D reconstruction of representative tracings of  $\alpha$ -SMA+ arteries. Traces highlight branches of the main arteries (B) or main with lower order arteries (C) that originated from the right (RCA, orange) or left (LCA, blue) coronary ostia where they meet the aorta. (D-F) Example of a co-dominant fetal heart as indicated by the presence of both RCA and LCA branches within the IVG. (E) and inferior septum (arrow in F). (G) *CXCL12* fluorescence *in situ* hybridization (FISH) and  $\alpha$ SMA immunolabeling on transverse sections through hearts at the indicated ages showed expression in coronary arteries (CA) and other unlabeled cells within the myocardium. LAD, left anterior descending; LCA, left coronary artery; lv, left ventricle; RCA, right coronary artery; rv, right ventricle. Scale bars: A and B 500  $\mu$ m; D, 2mm; F, 1mm; G, left panels, 1mm; middle panels 100  $\mu$ m.

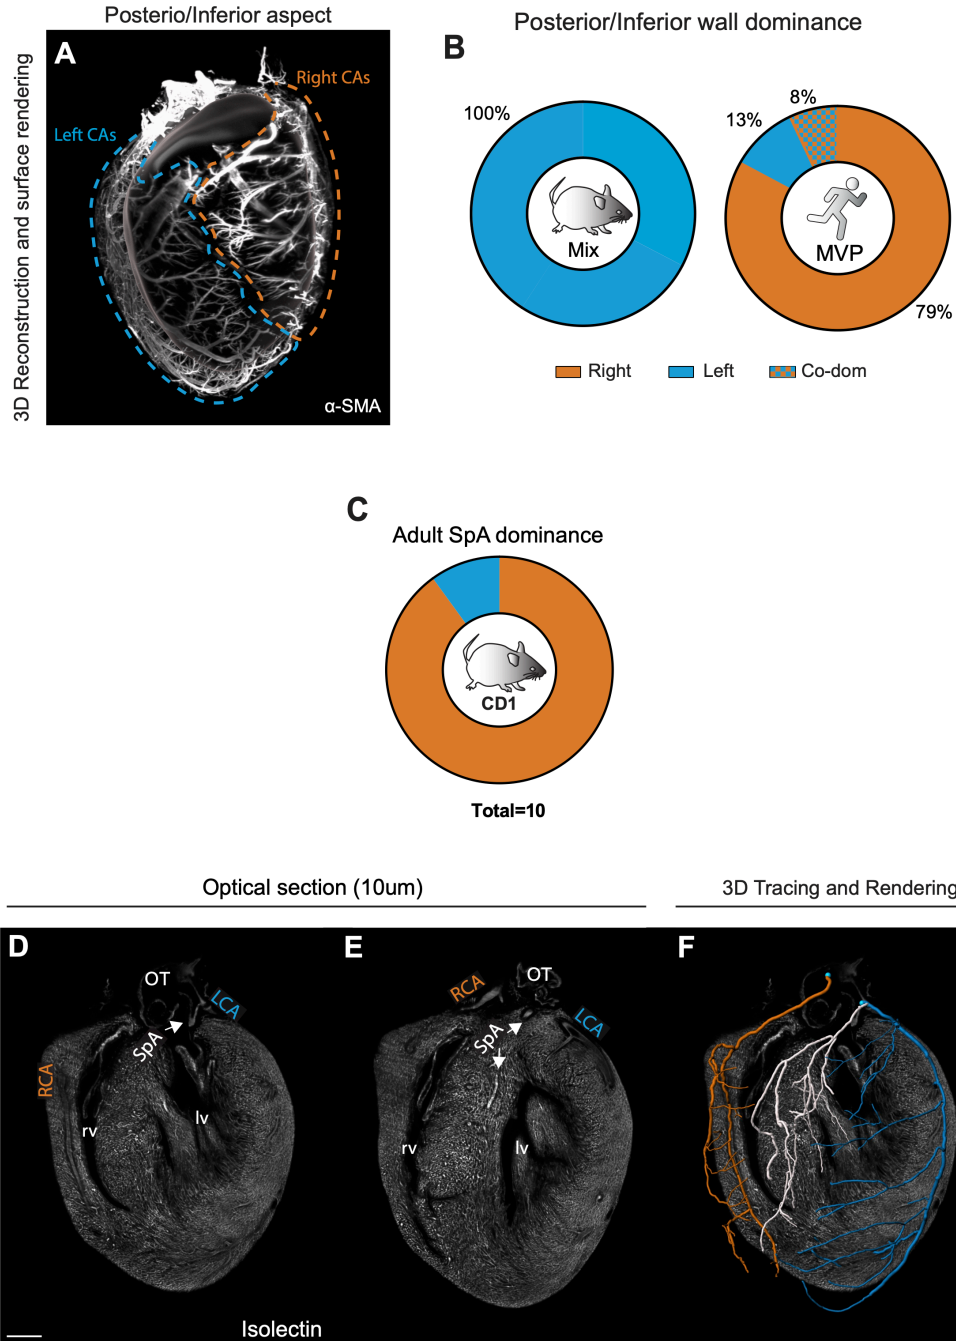

**Supplemental Figure 5. Investigating various forms of dominance in mouse hearts.** (A) Adult mouse heart subjected to whole-organ immunolabeling of coronary artery smooth muscle ( $\alpha$ -SMA) demonstrates an example of the invariable co-dominance on the posterior and inferior wall in this species. (B) Quantification of dominance on the posterior/inferior wall of adult mouse hearts from mixed strains. N=30. Human dominance rates in the MVP cohort is shown for comparison. (C) Quantification of septal artery (SpA) dominance in adult CD1 mouse hearts revealed that rates are like those observed in neonatal mice. N=10 hearts. (D-E) Example of the *in vivo* labeling method for identifying SpA dominance in mice. LCA, left coronary artery; lv, left ventricle; OT, outflow tract; RCA, right coronary artery; rv, right ventricle. Scale bars: A, 1mm; D, 300 $\mu$ m





## SUPPLEMENTARY TEXT

### **VA Million Veteran Program: Core Acknowledgement for Publications February 2023**

#### **MVP Program Office**

- Sumitra Muralidhar, Ph.D., Program Director  
US Department of Veterans Affairs, 810 Vermont Avenue NW, Washington, DC 20420
- Jennifer Moser, Ph.D., Associate Director, Scientific Programs  
US Department of Veterans Affairs, 810 Vermont Avenue NW, Washington, DC 20420
- Jennifer E. Deen, B.S., Associate Director, Cohort & Public Relations  
US Department of Veterans Affairs, 810 Vermont Avenue NW, Washington, DC 20420

#### **MVP Executive Committee**

- Co-Chair: Philip S. Tsao, Ph.D.  
VA Palo Alto Health Care System, 3801 Miranda Avenue, Palo Alto, CA 94304
- Co-Chair: Sumitra Muralidhar, Ph.D.  
US Department of Veterans Affairs, 810 Vermont Avenue NW, Washington, DC 20420
- J. Michael Gaziano, M.D., M.P.H.  
VA Boston Healthcare System, 150 S. Huntington Avenue, Boston, MA 02130
- Elizabeth Hauser, Ph.D.  
Durham VA Medical Center, 508 Fulton Street, Durham, NC 27705
- Amy Kilbourne, Ph.D., M.P.H.  
VA HSR&D, 2215 Fuller Road, Ann Arbor, MI 48105
- Shiuh-Wen Luoh, M.D., Ph.D.  
VA Portland Health Care System, 3710 SW US Veterans Hospital Rd, Portland, OR 97239
- Michael Matheny, M.D., M.S., M.P.H.  
VA Tennessee Valley Healthcare System, 1310 24<sup>th</sup> Ave. South, Nashville, TN 37212
- Dave Oslin, M.D.  
Philadelphia VA Medical Center, 3900 Woodland Avenue, Philadelphia, PA 19104

#### **MVP Co-Principal Investigators**

- J. Michael Gaziano, M.D., M.P.H.  
VA Boston Healthcare System, 150 S. Huntington Avenue, Boston, MA 02130
- Philip S. Tsao, Ph.D.  
VA Palo Alto Health Care System, 3801 Miranda Avenue, Palo Alto, CA 94304

#### **MVP Core Operations**

- Lori Churby, B.S., Director, MVP Regulatory Affairs  
VA Palo Alto Health Care System, 3801 Miranda Avenue, Palo Alto, CA 94304
- Stacey B. Whitbourne, Ph.D., Director, MVP Cohort Management  
VA Boston Healthcare System, 150 S. Huntington Avenue, Boston, MA 02130
- Jessica V. Brewer, M.P.H., Director, MVP Recruitment & Enrollment

- VA Boston Healthcare System, 150 S. Huntington Avenue, Boston, MA 02130
- Shahpoor (Alex) Shayan, M.S., Director, MVP Recruitment and Enrollment Informatics  
VA Boston Healthcare System, 150 S. Huntington Avenue, Boston, MA 02130
- Luis E. Selva, Ph.D., Executive Director, MVP Biorepositories  
VA Boston Healthcare System, 150 S. Huntington Avenue, Boston, MA 02130
- Saiju Pyarajan Ph.D., Director, Data and Computational Sciences  
VA Boston Healthcare System, 150 S. Huntington Avenue, Boston, MA 02130
- Kelly Cho, M.P.H, Ph.D., Director, MVP Phenomics Data Core  
VA Boston Healthcare System, 150 S. Huntington Avenue, Boston, MA 02130
- Scott L. DuVall, Ph.D., Director, VA Informatics and Computing Infrastructure (VINCI)  
VA Salt Lake City Health Care System, 500 Foothill Drive, Salt Lake City, UT 84148
- Mary T. Brophy M.D., M.P.H., Director, VA Central Biorepository  
VA Boston Healthcare System, 150 S. Huntington Avenue, Boston, MA 02130
- MVP Coordinating Centers
  - o MVP Coordinating Center, Boston - J. Michael Gaziano, M.D., M.P.H.  
VA Boston Healthcare System, 150 S. Huntington Avenue, Boston, MA 02130
  - o MVP Coordinating Center, Palo Alto – Philip S. Tsao, Ph.D.  
VA Palo Alto Health Care System, 3801 Miranda Avenue, Palo Alto, CA 94304
  - o MVP Information Center, Canandaigua – Brady Stephens, M.S.  
Canandaigua VA Medical Center, 400 Fort Hill Avenue, Canandaigua, NY 14424
  - o Cooperative Studies Program Clinical Research Pharmacy Coordinating Center, Albuquerque –  
Todd Connor, Pharm.D.; Dean P. Argyres, B.S., M.S.  
New Mexico VA Health Care System, 1501 San Pedro Drive SE, Albuquerque, NM 87108

### **MVP Publications and Presentations Committee**

- Co-Chair: Themistocles L. Assimes, M.D., Ph. D  
VA Palo Alto Health Care System, 3801 Miranda Avenue, Palo Alto, CA 94304
- Co-Chair: Adriana Hung, M.D.; M.P.H  
VA Tennessee Valley Healthcare System, 1310 24<sup>th</sup> Ave. South, Nashville, TN 37212
- Co-Chair: Henry Kranzler, M.D.  
Philadelphia VA Medical Center, 3900 Woodland Avenue, Philadelphia, PA 19104

### **MVP Local Site Investigators**

- Samuel Aguayo, M.D., Phoenix VA Health Care System  
650 E. Indian School Road, Phoenix, AZ 85012
- Sunil Ahuja, M.D., South Texas Veterans Health Care System  
7400 Merton Minter Boulevard, San Antonio, TX 78229
- Kathrina Alexander, M.D., Veterans Health Care System of the Ozarks  
1100 North College Avenue, Fayetteville, AR 72703
- Xiao M. Androulakis, M.D., Columbia VA Health Care System  
6439 Garners Ferry Road, Columbia, SC 29209
- Prakash Balasubramanian, M.D., William S. Middleton Memorial Veterans Hospital  
2500 Overlook Terrace, Madison, WI 53705
- Zuhair Ballas, M.D., Iowa City VA Health Care System  
601 Highway 6 West, Iowa City, IA 52246-2208
- Jean Beckham, Ph.D., Durham VA Medical Center  
508 Fulton Street, Durham, NC 27705
- Sujata Bhushan, M.D., VA North Texas Health Care System  
4500 S. Lancaster Road, Dallas, TX 75216

- Edward Boyko, M.D., VA Puget Sound Health Care System  
1660 S. Columbian Way, Seattle, WA 98108-1597
- David Cohen, M.D., Portland VA Medical Center  
3710 SW U.S. Veterans Hospital Road, Portland, OR 97239
- Louis Dellitalia, M.D., Birmingham VA Medical Center  
700 S. 19th Street, Birmingham AL 35233
- L. Christine Faulk, M.D., Robert J. Dole VA Medical Center  
5500 East Kellogg Drive, Wichita, KS 67218-1607
- Joseph Fayad, M.D., VA Southern Nevada Healthcare System  
6900 North Pecos Road, North Las Vegas, NV 89086
- Daryl Fujii, Ph.D., VA Pacific Islands Health Care System  
459 Patterson Rd, Honolulu, HI 96819
- Saib Gappy, M.D., John D. Dingell VA Medical Center  
4646 John R Street, Detroit, MI 48201
- Frank Gesek, Ph.D., White River Junction VA Medical Center  
163 Veterans Drive, White River Junction, VT 05009
- Jennifer Greco, M.D., Sioux Falls VA Health Care System  
2501 W 22nd Street, Sioux Falls, SD 57105
- Michael Godschalk, M.D., Richmond VA Medical Center  
1201 Broad Rock Blvd., Richmond, VA 23249
- Todd W. Gress, M.D., Ph.D., Hershel "Woody" Williams VA Medical Center  
1540 Spring Valley Drive, Huntington, WV 25704
- Samir Gupta, M.D., M.S.C.S., VA San Diego Healthcare System  
3350 La Jolla Village Drive, San Diego, CA 92161
- Salvador Gutierrez, M.D., Edward Hines, Jr. VA Medical Center  
5000 South 5th Avenue, Hines, IL 60141
- John Harley, M.D., Ph.D., Cincinnati VA Medical Center  
3200 Vine Street, Cincinnati, OH 45220
- Kimberly Hammer, Ph.D., Fargo VA Health Care System  
2101 N. Elm, Fargo, ND 58102
- Mark Hamner, M.D., Ralph H. Johnson VA Medical Center  
109 Bee Street, Mental Health Research, Charleston, SC 29401
- Adriana Hung, M.D., M.P.H., VA Tennessee Valley Healthcare System  
1310 24th Avenue, South Nashville, TN 37212
- Robin Hurley, M.D., W.G. (Bill) Hefner VA Medical Center  
1601 Brenner Ave, Salisbury, NC 28144
- Pran Iruvanti, D.O., Ph.D., Hampton VA Medical Center  
100 Emancipation Drive, Hampton, VA 23667
- Frank Jacono, M.D., VA Northeast Ohio Healthcare System  
10701 East Boulevard, Cleveland, OH 44106
- Darshana Jhala, M.D., Philadelphia VA Medical Center  
3900 Woodland Avenue, Philadelphia, PA 19104
- Scott Kinlay, M.B.B.S., Ph.D., VA Boston Healthcare System  
150 S. Huntington Avenue, Boston, MA 02130
- Jon Klein, M.D., Ph.D., Louisville VA Medical Center  
800 Zorn Avenue, Louisville, KY 40206
- Michael Landry, Ph.D., Southeast Louisiana Veterans Health Care System  
2400 Canal Street, New Orleans, LA 70119
- Peter Liang, M.D., M.P.H., VA New York Harbor Healthcare System  
423 East 23rd Street, New York, NY 10010
- Suthat Liangpunsakul, M.D., M.P.H., Richard Roudebush VA Medical Center

1481 West 10th Street, Indianapolis, IN 46202

- Jack Lichy, M.D., Ph.D., Washington DC VA Medical Center  
50 Irving St, Washington, D. C. 20422
- C. Scott Mahan, M.D., Charles George VA Medical Center  
1100 Tunnel Road, Asheville, NC 28805
- Ronnie Marrache, M.D., VA Maine Healthcare System  
1 VA Center, Augusta, ME 04330
- Stephen Mastorides, M.D., James A. Haley Veterans' Hospital  
13000 Bruce B. Downs Blvd, Tampa, FL 33612
- Elisabeth Mates M.D., Ph.D., VA Sierra Nevada Health Care System  
975 Kirman Avenue, Reno, NV 89502
- Kristin Mattocks, Ph.D., M.P.H., Central Western Massachusetts Healthcare System  
421 North Main Street, Leeds, MA 01053
- Paul Meyer, M.D., Ph.D., Southern Arizona VA Health Care System  
3601 S 6th Avenue, Tucson, AZ 85723
- Jonathan Moorman, M.D., Ph.D., James H. Quillen VA Medical Center  
Corner of Lamont & Veterans Way, Mountain Home, TN 37684
- Timothy Morgan, M.D., VA Long Beach Healthcare System  
5901 East 7th Street Long Beach, CA 90822
- Maureen Murdoch, M.D., M.P.H., Minneapolis VA Health Care System  
One Veterans Drive, Minneapolis, MN 55417
- James Norton, Ph.D., VA Health Care Upstate New York  
113 Holland Avenue, Albany, NY 12208
- Olaoluwa Okusaga, M.D., Michael E. DeBakey VA Medical Center  
2002 Holcombe Blvd, Houston, TX 77030
- Kris Ann Oursler, M.D., Salem VA Medical Center  
1970 Roanoke Blvd, Salem, VA 24153
- Ana Palacio, M.D., M.P.H., Miami VA Health Care System  
1201 NW 16th Street, 11 GRC, Miami FL 33125
- Samuel Poon, M.D., Manchester VA Medical Center  
718 Smyth Road, Manchester, NH 03104
- Emily Potter, Pharm.D., VA Eastern Kansas Health Care System  
4101 S 4th Street Trafficway, Leavenworth, KS 66048
- Michael Rauchman, M.D., St. Louis VA Health Care System  
915 North Grand Blvd, St. Louis, MO 63106
- Richard Servatius, Ph.D., Syracuse VA Medical Center  
800 Irving Avenue, Syracuse, NY 13210
- Satish Sharma, M.D., Providence VA Medical Center  
830 Chalkstone Avenue, Providence, RI 02908
- River Smith, Ph.D., Eastern Oklahoma VA Health Care System  
1011 Honor Heights Drive, Muskogee, OK 74401
- Peruvemba Sriram, M.D., N. FL/S. GA Veterans Health System  
1601 SW Archer Road, Gainesville, FL 32608
- Patrick Strollo, Jr., M.D., VA Pittsburgh Health Care System  
University Drive, Pittsburgh, PA 15240
- Neeraj Tandon, M.D., Overton Brooks VA Medical Center  
510 East Stoner Ave, Shreveport, LA 71101
- Philip Tsao, Ph.D., VA Palo Alto Health Care System  
3801 Miranda Avenue, Palo Alto, CA 94304-1290
- Gerardo Villareal, M.D., New Mexico VA Health Care System  
1501 San Pedro Drive, S.E. Albuquerque, NM 87108

- Agnes Wallbom, M.D., M.S., VA Greater Los Angeles Health Care System  
11301 Wilshire Blvd, Los Angeles, CA 90073
- Jessica Walsh, M.D., VA Salt Lake City Health Care System  
500 Foothill Drive, Salt Lake City, UT 84148
- John Wells, Ph.D., Edith Nourse Rogers Memorial Veterans Hospital  
200 Springs Road, Bedford, MA 01730
- Jeffrey Whittle, M.D., M.P.H., Clement J. Zablocki VA Medical Center  
5000 West National Avenue, Milwaukee, WI 53295
- Mary Whooley, M.D., San Francisco VA Health Care System  
4150 Clement Street, San Francisco, CA 94121
- Allison E. Williams, N.D., Ph.D., R.N, Bay Pines VA Healthcare System  
10,000 Bay Pines Blvd Bay Pines, FL 33744
- Peter Wilson, M.D., Atlanta VA Medical Center  
1670 Clairmont Road, Decatur, GA 30033
- Junzhe Xu, M.D., VA Western New York Healthcare System  
3495 Bailey Avenue, Buffalo, NY 14215-1199
- Shing Shing Yeh, Ph.D., M.D., Northport VA Medical Center  
79 Middleville Road, Northport, NY 11768
